# Supplementary material for: Machine learning algorithms for systematic review: reducing workload in a preclinical review of animal studies and reducing human screening error
Source: Syst Rev. 2019 Jan 15;8:23. doi: 10.1186/s13643-019-0942-7 (PMC6334440; doi:10.1186/s13643-019-0942-7)
Supplement: Supplementary file 3 — Data S1. Data file to display levels of precision with different levels of prevelance of inclusion. (XLSX 17 kb) [file 13643_2019_942_MOESM3_ESM.xlsx]

## Sheet: Sheet1
Inclusion Prevelance	Likelihood Ratio	Odds Ratio	Precision
0.5	8.736	4.368	0.813711
0.49	8.736	4.28064	0.810629
0.48	8.736	4.19328	0.807443
0.47	8.736	4.10592	0.804149
0.46	8.736	4.01856	0.80074
0.45	8.736	3.9312	0.79721
0.44	8.736	3.84384	0.793552
0.43	8.736	3.75648	0.78976
0.42	8.736	3.66912	0.785827
0.41	8.736	3.58176	0.781743
0.4	8.736	3.4944	0.777501
0.39	8.736	3.40704	0.77309
0.38	8.736	3.31968	0.768501
0.37	8.736	3.23232	0.763723
0.36	8.736	3.14496	0.758743
0.35	8.736	3.0576	0.753549
0.34	8.736	2.97024	0.748126
0.33	8.736	2.88288	0.742459
0.32	8.736	2.79552	0.736531
0.31	8.736	2.70816	0.730324
0.3	8.736	2.6208	0.723818
0.29	8.736	2.53344	0.71699
0.28	8.736	2.44608	0.709815
0.27	8.736	2.35872	0.702268
0.26	8.736	2.27136	0.694317
0.25	8.736	2.184	0.68593
0.24	8.736	2.09664	0.677069
0.23	8.736	2.00928	0.667695
0.22	8.736	1.92192	0.657759
0.21	8.736	1.83456	0.647212
0.2	8.736	1.7472	0.635993
0.19	8.736	1.65984	0.624038
0.18	8.736	1.57248	0.61127
0.17	8.736	1.48512	0.597605
0.16	8.736	1.39776	0.582944
0.15	8.736	1.3104	0.567175
0.14	8.736	1.22304	0.550166
0.13	8.736	1.13568	0.531765
0.12	8.736	1.04832	0.511795
0.11	8.736	0.96096	0.490046
0.1	8.736	0.8736	0.466268
0.09	8.736	0.78624	0.440165
0.08	8.736	0.69888	0.411377
0.07	8.736	0.61152	0.379468
0.06	8.736	0.52416	0.343901
0.05	8.736	0.4368	0.304009
0.04	8.736	0.34944	0.258952
0.03	8.736	0.26208	0.207657
0.02	8.736	0.17472	0.148733
0.01	8.736	0.08736	0.0803414
0	8.736	0	0
